# Supplementary material for: An amplicon-based Illumina and nanopore sequencing workflow for Chikungunya virus West Africa genotype
Source: bioRxiv or medRxiv preprint supplement (doi:10.1101/2023.12.07.23299611), 2023-12-09

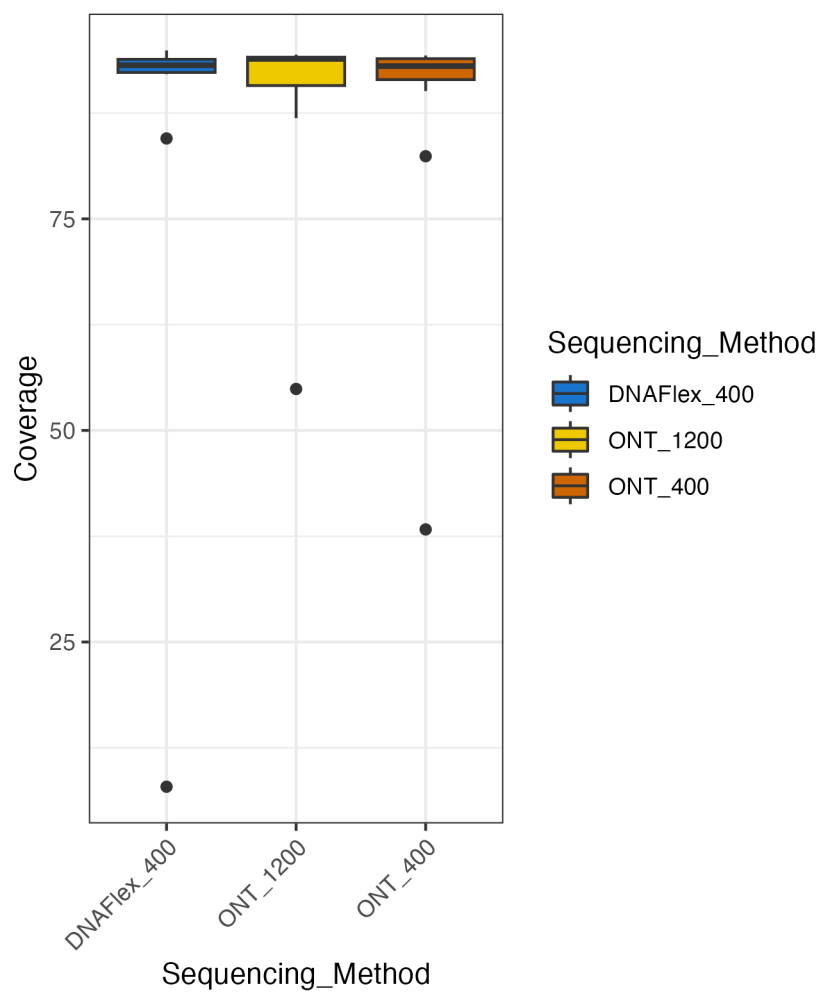

Supplement: Supplementary file [file media-1.zip]
